# Supplementary material for: The Orthopaedic Trauma Patient Experience: A Qualitative Case Study of Orthopaedic Trauma Patients in Uganda
Source: PubMed Central journal article supplement (PMC4215992; doi:10.1371/journal.pone.0110940), 2014-10-31
Supplement: pone.0110940.s001.pdf [file pone.0110940.s001.pdf]

## Complete summary of all patient data

| <b>Demographics</b>   |                                                 |           |
|-----------------------|-------------------------------------------------|-----------|
|                       | <b>Sex, n (%)</b>                               |           |
|                       | Male                                            | 30 (85.7) |
|                       | Female                                          | 5 (14.2)  |
|                       | <b>Age, n (%)</b>                               |           |
|                       | 18-19                                           | 1 (2.9)   |
|                       | 20-29                                           | 8 (22.9)  |
|                       | 30-39                                           | 8 (22.9)  |
|                       | 40-49                                           | 7 (20.0)  |
|                       | 50-59                                           | 4 (11.4)  |
|                       | 60-69                                           | 3 (8.6)   |
|                       | 70-79                                           | 3 (8.6)   |
|                       | 80-89                                           | 1 (2.9)   |
|                       |                                                 |           |
| <b>Household Data</b> |                                                 |           |
|                       | <b>Dependents</b>                               |           |
|                       | Mean (SD)                                       | 5.7 (3.5) |
|                       | <b>Type of home, n (%)</b>                      |           |
|                       | Independent house                               | 16 (45.7) |
|                       | Boys quarters                                   | 8 (22.9)  |
|                       | Tenement (Muzigo)                               | 5 (14.3)  |
|                       | Hut                                             | 3 (8.6)   |
|                       | Sharing house/flat/apartment                    | 2 (5.7)   |
|                       | Other                                           | 1 (2.9)   |
|                       | <b>Stairs in home, n (%)</b>                    |           |
|                       | Yes                                             | 4 (11.4)  |
|                       | No                                              | 31 (88.6) |
|                       | <b>Electricity in home, n (%)</b>               |           |
|                       | Yes                                             | 20 (57.1) |
|                       | No                                              | 15 (42.9) |
|                       | <b>Source of drinking water for home, n (%)</b> |           |
|                       | Public taps                                     | 11 (31.4) |
|                       | Private connection                              | 8 (22.9)  |
|                       | Bore-hole                                       | 7 (20.0)  |
|                       | Protected well/spring                           | 5 (14.2)  |
|                       | Unprotected well/spring                         | 3 (8.6)   |
|                       | River, stream, lake, pond                       | 1 (2.9)   |
|                       | <b>Marital status, n (%)</b>                    |           |
|                       | Married                                         | 25 (71.4) |
|                       | Never married                                   | 7 (20.0)  |
|                       | Undisclosed                                     | 2 (5.7)   |
|                       | Divorced                                        | 1 (2.9)   |

|  |                                                    |                         |
|--|----------------------------------------------------|-------------------------|
|  | <b>Education level, n (%)</b>                      |                         |
|  | No education                                       | 1 (2.9)                 |
|  | Primary education                                  | 19 (54.2)               |
|  | Secondary education                                | 11 (31.4)               |
|  | Diploma/technical school                           | 2 (5.7)                 |
|  | Degree                                             | 2 (5.7)                 |
|  | <b>Years in current home</b>                       |                         |
|  | Median (IQR)                                       | 9 (5-20)                |
|  | <b>Distance from home to Mulago Hospital (km)</b>  |                         |
|  | Median (IQR)                                       | 11 (6 - 80)             |
|  |                                                    |                         |
|  | <b>Economic Data</b>                               |                         |
|  | <b>Main income earner, n (%)</b>                   |                         |
|  | Patient                                            | 26 (74.3)               |
|  | Child of patient                                   | 4 (11.4)                |
|  | Parent of patient                                  | 3 (8.6)                 |
|  | Other                                              | 2 (5.7)                 |
|  | <b>Employment situation prior to injury, n (%)</b> |                         |
|  | Working                                            | 29 (82.9)               |
|  | Taking care of house/family                        | 4 (11.4)                |
|  | In school                                          | 1 (2.9)                 |
|  | Disabled                                           | 1 (2.9)                 |
|  | <b>Occupation, n (%)</b>                           |                         |
|  | Business/Service                                   | 13 (37.1)               |
|  | Farmer                                             | 7 (20.0)                |
|  | Labourer                                           | 6 (17.1)                |
|  | Boda-boda driver                                   | 5 (14.3)                |
|  | Not employed                                       | 4 (11.4)                |
|  | <b>Formal contract, n (%)</b>                      |                         |
|  | No                                                 | 30 (85.7)               |
|  | Yes                                                | 5 (14.3)                |
|  | <b>Annual Income, USD</b>                          |                         |
|  | Median (IQR)                                       | \$1200 (\$276 - \$4040) |
|  | <b>Other sources of income, n (%)</b>              |                         |
|  | Remittance                                         | 1 (2.9)                 |
|  | Church                                             | 1 (2.9)                 |
|  | None                                               | 33 (94.3)               |
|  |                                                    |                         |
|  | <b>Injury Data</b>                                 |                         |
|  | <b>Mechanism of injury, n (%)</b>                  |                         |
|  | Multi-vehicle trauma                               | 13 (37.1)               |
|  | Pedestrian-vehicle trauma                          | 10 (28.6)               |
|  | Single-vehicle trauma                              | 5 (14.3)                |
|  | Fall from standing                                 | 4 (11.4)                |

|                                                      |                    |           |
|------------------------------------------------------|--------------------|-----------|
|                                                      | Gun shot wound     | 2 (5.7)   |
|                                                      | Violence (non-gun) | 1 (2.9)   |
| <b>Time: Injury to Mulago Hospital, n (%)</b>        |                    |           |
|                                                      | Less than 24 hrs   | 24 (68.6) |
|                                                      | 24 - 48 hrs        | 2 (5.7)   |
|                                                      | 48 - 72 hrs        | 1 (2.9)   |
|                                                      | 3 - 10 days        | 5 (14.3)  |
|                                                      | More than 10 days  | 3 (8.6)   |
| <b>Treatment within two weeks post injury, n (%)</b> |                    |           |
|                                                      | Yes                | 8 (22.8)  |
|                                                      | No                 | 27 (77.1) |
| <b>Patient admitted from:, n (%)</b>                 |                    |           |
|                                                      | Injury site        | 14 (40.0) |
|                                                      | Other hospital     | 13 (37.1) |
|                                                      | Home               | 5 (14.3)  |
|                                                      | Local clinic       | 3 (8.6)   |
| <b>Method of transport to Mulago Hospital, n (%)</b> |                    |           |
|                                                      | Motor vehicle      | 24 (68.6) |
|                                                      | Ambulance          | 8 (22.9)  |
|                                                      | Boda-boda          | 2 (5.7)   |
|                                                      | Other              | 1 (2.9)   |
