# Supplementary material for: The Orthopaedic Trauma Patient Experience: A Qualitative Case Study of Orthopaedic Trauma Patients in Uganda
Source: PubMed Central journal article supplement (PMC4215992; doi:10.1371/journal.pone.0110940), 2014-10-31
Supplement: pone.0110940.s002.pdf [file pone.0110940.s002.pdf]

|    | Line-by-line Code                                     | Frequency of code | Number of references |
|----|-------------------------------------------------------|-------------------|----------------------|
| 1  | Supports/lives with children                          | 21                | 21                   |
| 2  | Supports/lives with spouse                            | 20                | 20                   |
| 3  | Femur fracture                                        | 20                | 20                   |
| 4  | Direct to Mulago (trauma) Hospital                    | 18                | 18                   |
| 5  | Boda boda accident                                    | 14                | 14                   |
| 6  | Transfer to Mulago from other hospital                | 14                | 14                   |
| 7  | Children in school                                    | 12                | 12                   |
| 8  | No treatment at “other” hospital                      | 12                | 12                   |
| 9  | Tibia fracture                                        | 11                | 11                   |
| 10 | Immediate transfer to hospital from injury site       | 11                | 11                   |
| 11 | Supports/lives with siblings                          | 10                | 10                   |
| 12 | Hit by vehicle/bicycle                                | 10                | 10                   |
| 13 | Open fracture                                         | 8                 | 8                    |
| 14 | Waiting on ward for treatment/ Delayed treatment      | 8                 | 8                    |
| 15 | Makes decent/good money                               | 7                 | 7                    |
| 16 | Diploma/degree                                        | 7                 | 7                    |
| 17 | Farmer                                                | 6                 | 6                    |
| 18 | Main income earner                                    | 5                 | 5                    |
| 19 | Little money/income                                   | 5                 | 5                    |
| 20 | Taxi/boda boda driver                                 | 4                 | 4                    |
| 21 | Sell products at market                               | 4                 | 4                    |
| 22 | Difficulty finding employment/irregular income        | 4                 | 3                    |
| 23 | Supports/lives with grandchildren                     | 4                 | 4                    |
| 24 | Owens (food vending) shop                             | 4                 | 4                    |
| 25 | Access to money                                       | 3                 | 3                    |
| 26 | Hemi-arthroplasty                                     | 3                 | 3                    |
| 27 | Private room                                          | 3                 | 3                    |
| 28 | Well educated ( <i>included in degree code also</i> ) | 3                 | 3                    |
| 29 | External fixator                                      | 3                 | 3                    |
| 30 | Financial support from parents                        | 3                 | 3                    |
| 31 | Unemployed                                            | 3                 | 3                    |
| 32 | Helps on farm/around house                            | 3                 | 3                    |

|    |                                                                    |   |   |
|----|--------------------------------------------------------------------|---|---|
| 33 | Wait at home before going to hospital because of concerns of costs | 3 | 3 |
| 34 | Bus accident                                                       | 3 | 3 |
| 35 | Fall                                                               | 3 | 3 |
| 36 | Mechanic                                                           | 2 | 2 |
| 37 | Security officer                                                   | 2 | 2 |
| 38 | Widow                                                              | 2 | 2 |
| 39 | Employer to pay medical bills                                      | 2 | 2 |
| 40 | Plate fixation                                                     | 2 | 2 |
| 41 | Supports others' children                                          | 2 | 2 |
| 42 | Grandparent                                                        | 2 | 2 |
| 43 | Up-country                                                         | 2 | 2 |
| 44 | No employees                                                       | 2 | 2 |
| 45 | Supports/lives with parent                                         | 2 | 2 |
| 46 | Financial support by children                                      | 2 | 2 |
| 47 | Death of family member                                             | 2 | 2 |
| 48 | Robbery                                                            | 2 | 2 |
| 49 | Gunshot                                                            | 2 | 2 |
| 50 | Tuberculosis                                                       | 2 | 2 |
| 51 | Technician                                                         | 2 | 2 |
| 52 | Traction/Skin traction                                             | 2 | 2 |
| 53 | Injury while working                                               | 2 | 2 |
| 54 | Can't afford school for children                                   | 2 | 2 |
| 55 | Financial support from family                                      | 2 | 2 |
| 56 | Family support during rehabilitation/hospitalization               | 2 | 2 |
| 57 | Husband-and-wife owned business                                    | 2 | 2 |
| 58 | Microbiologist                                                     | 1 | 1 |
| 59 | Contacts at hospital                                               | 1 | 1 |
| 60 | Wasn't working                                                     | 1 | 1 |
| 61 | Ambulance                                                          | 1 | 1 |
| 62 | No treatment up-country                                            | 1 | 1 |
| 63 | No income while in hospital                                        | 1 | 1 |
| 64 | RTA                                                                | 1 | 1 |
| 65 | Laborer                                                            | 1 | 1 |
| 66 | Fisheries officer                                                  | 1 | 1 |
| 67 | Delayed pain management                                            | 1 | 1 |
| 68 | Private hospital                                                   | 1 | 1 |
| 69 | Kids out of school while                                           | 1 | 1 |

|     | parent in hospital                                                                |   |   |
|-----|-----------------------------------------------------------------------------------|---|---|
| 70  | Porter                                                                            | 1 | 1 |
| 71  | Chronic lung disease                                                              | 1 | 1 |
| 72  | IM nail                                                                           | 1 | 1 |
| 73  | Cancer                                                                            | 1 | 1 |
| 74  | Barber                                                                            | 1 | 1 |
| 75  | Police officer                                                                    | 1 | 1 |
| 76  | Driving too fast                                                                  | 1 | 1 |
| 77  | Braids hair for income                                                            | 1 | 1 |
| 78  | Financial support from late spouse                                                | 1 | 1 |
| 79  | Loans/scholarships for school                                                     | 1 | 1 |
| 80  | Financial support from friend                                                     | 1 | 1 |
| 81  | Hope injury will not require medical attention                                    | 1 | 1 |
| 82  | Divorced                                                                          | 1 | 1 |
| 83  | Travel extra distance to be near family during hospitalization                    | 1 | 1 |
| 84  | Tailor                                                                            | 1 | 1 |
| 85  | Much younger spouse                                                               | 1 | 1 |
| 86  | Live off one's farm                                                               | 1 | 1 |
| 87  | Welder                                                                            | 1 | 1 |
| 88  | Starts going to church after injury to avoid future bad luck such as the accident | 1 | 1 |
| 89  | Alcohol abuse                                                                     | 1 | 1 |
| 90  | Marijuana use                                                                     | 1 | 1 |
| 91  | Intoxicated at time of injury                                                     | 1 | 1 |
| 92  | Schizophrenia                                                                     | 1 | 1 |
| 93  | Co-incident illness making it hard to work                                        | 1 | 1 |
| 94  | Lives alone                                                                       | 1 | 1 |
| 95  | Not married                                                                       | 1 | 1 |
| 96  | Has employees                                                                     | 1 | 1 |
| 97  | Attacked/in a fight                                                               | 1 | 1 |
| 98  | Construction worker                                                               | 1 | 1 |
| 99  | Transfer between hospitals by personal car                                        | 1 | 1 |
| 100 | From South Sudan                                                                  | 1 | 1 |
| 101 | Own a bar                                                                         | 1 | 1 |
| 102 | Move to Uganda for improved schooling for kids                                    | 1 | 1 |

|     |                           |   |   |
|-----|---------------------------|---|---|
| 103 | DJ                        | 1 | 1 |
| 104 | Employee of large company | 1 | 1 |
